# Supplementary material for: Advanced Glycation End Products in the Pathogenesis of Psoriasis
Source: MDPI journal article supplement (doi:10.3390/ijms18112471), 2017-11-20
Supplement: s1 [file s1]

**Table S1.** Skin AGEs levels are increased in patients with severe psoriasis as compared to patients with mild psoriasis, severe eczema and healthy controls [1].

| <b>Skin AGEs (a.u.)</b> | <b>Mean</b> | <b>95% CI</b> | <b>SE</b> | <b>SD</b> | <b>P Value</b> |
|-------------------------|-------------|---------------|-----------|-----------|----------------|
| Severe Psoriasis        | 2.87        | 2.64 – 3.11   | 0.115     | 0.619     | -              |
| Mild Psoriasis          | 2.15        | 1.99 – 2.30   | 0.075     | 0.467     | 0.04           |
| Severe Eczema           | 1.90        | 1.73 – 2.07   | 0.084     | 0.499     | 0.02           |
| Healthy Individuals     | 1.86        | 1.68 – 2.05   | 0.09      | 0.527     | 0.01           |

Values are mean  $\pm$  standard deviation (SD) or standard error (SE) or confidential intervals (CI). Skin AGEs are expressed in arbitrary units (a.u.) and evaluated by the AGE Reader mu<sup>®</sup> (Diagnoptics Technologies B.V., Groningen, the Netherlands), which measures tissue AGEs by means of fluorescence technique.
